# Supplementary material for: Adolescent temperament and parental alcohol provision predict adolescent hazardous alcohol use
Source: Research Square preprint supplement (doi:10.21203/rs.3.rs-7206982/v1), 2025-09-10
Supplement: Supplementary file 1 [file 3337eaec2b108871fc1fef5c.docx]

**Supplementary Table 1**.

*Comparisons of gender, age, at-risk alcohol use and indications of alcohol dependence between adolescents who have been offered alcohol by parents or other caregivers (n = 127) and those who have not been offered alcohol (n = 1333).*

| | **Variables** | *Total n* | Not offered alcohol % or *m* (sd) | Offered alcohol % or *m* (sd) | Effect size | *p* | | --- | --- | --- | --- | --- | --- | | Male gender | 709 | 47.9 % | 55.9 % | .045 | .101 | | Age | 1460 | 13.3 (0.6) | 13.5 (0.7) | .267 | .008 | | At-risk alcohol use | 378 | 44.4 % | 83.6 % | .192 | < .001 | | Alcohol dependence | 174 | 19.5 % | 50.9 % | .192 | < .001 | | | | | | |  |  |  |  |  |
| --- | --- | --- | --- | --- | --- | --- | --- | --- | --- | --- | --- | --- | --- | --- | --- | --- | --- | --- | --- | --- | --- | --- | --- | --- | --- | --- | --- | --- | --- | --- | --- | --- | --- | --- | --- | --- | --- | --- | --- | --- |
|  |  |  |  |  |  |  |  |  |  |  |
|  |  |  |  |  |  |  |  |  |  |  |

In Supplementary Table 1, comparisons are presented for age, gender, at-risk alcohol use, and indications of alcohol dependence at T3 between adolescents who had been offered alcohol by their parents at T1 and those who had not. Adolescents who had been offered alcohol by their parents were slightly older (*t*(1457) = -2.69, *p* = .008). A higher proportion of adolescents who had been offered alcohol by their parents exhibited at-risk alcohol use (83.6% vs. 44.4%; χ²(1, *N* = 802) = 31.58, *p* < .001). Similarly, a higher proportion of adolescents who had been offered alcohol by their parents showed indications of alcohol dependence (50.9% vs. 19.5%; χ²(1, *N* = 803) = 19.74, *p* < .001).

**Supplementary table 2**. Descriptives and background comparisons of the temperament clusters (*n* = 1373)

|  | Detached and fearless n = 314 | Unstable  n = 164 | Avoidant  n = 265 | Sociable thrill-seekers n = 228 | Social and content n = 392 | Effect size | *p* |
| --- | --- | --- | --- | --- | --- | --- | --- |
| Gender (male) | 70.4 % | 43.9 % | 37.0 % | 47.8 % | 39.0 % | .256 | <001 |
| Age | 13.3 (0.6) | 13.5 (0.6) | 13.4(0.6) | 13.5 (0.6) | 13.3 (0.6) | .019 | <.001 |
| Inebriation past 12 months | 3.8 % | 13.5 % | 2.7 % | 14.9 % | 0.8 % | .240 | <.001 |
| Alcohol within 24 hours | 41.3 % | 41.7 % | 26.4 % | 46.0 % | 20.2 % | .222 | <.001 |
| Parents’ permission to drink alcohol | 1.6 % | 7.3 % | 3.8 % | 4.9 % | 0.8 % | .233 | <.001 |
| Emotional abuse | 7.4 (2.7) | 9.0 (4.0) | 7.5 (2.8) | 7.1 (2.8) | 6.2(2.1) | .081 | <.001 |
| Emotional neglect | 7.8 (2.9) | 10.0(4.3) | 8.1(3.3) | 7.4 (3.1) | 6.1(2.0) | .130 | <.001 |
| *Perceived economy* |  |  |  |  |  |  |  |
| Less than others | 5.5 % | 13.6 % | 11.7 % | 6.7 % | 1.8 % | .205 | <.001 |
| Same as others | 77.0 % | 75.3 % | 81.7 % | 75.8 % | 87.1 % |  |  |
| More than others | 31.8 % | 10.6 % | 10.0 % | 22.9 % | 24.7 % |  |  |
| Parents not living together | 21.4 % | 18.1 % | 22.3 % | 18.4 % | 19.9 % | .143 | <.001 |
| Offered alcohol by caregiver at T1 | 9.2 % | 22.6 % | 4.5 % | 11.8 % | 3.8 % | .209 | <.001 |
| Offered alcohol by caregiver at T2 | 15.3 % | 19.4 % | 9.4 % | 19.3 % | 7.1 % |  |  |
| At-risk alcohol use | 50.6 % | 56.3 % | 33.7 % | 71.6 % | 38.5 % | .252 | <.001 |
| Alcohol dependence | 22.2 % | 18.5 % | 13.6 % | 28.4 % | 17.3 % | .285 | < .001 |

There were significant differences between the temperament profiles in all outcome measures as well as in all family-oriented variables and all individual-oriented variables. There was the highest percentage of boys in the 'detached and fearless' group (70.4 %) and the lowest percentage of boys in the 'avoidant' group (37.0 %; *χ*2 [4, *N* = 1363] = 89.66, *p* < .001). The personality profile 'unstable and sociable thrill-seekers' were slightly older than the other personality profiles *F* (4, 1353) = 6.56 *p* < .001. The group with the highest proportion who had been inebriated at some point in the last 12 months was 'sociable thrill-seekers' (14.9 %), while the group with the lowest proportion who had been inebriated was the 'social and content' (0.8 %; *χ*2 [4, *N* = 1359] = 78.24, *p* < .001). In the group of 'sociable thrill-seekers', there was also the highest proportion who could access alcohol within 24 hours (46.0 %), while the lowest proportion was in the group of 'social and content' (20.2 %); *χ*2 [4, *N* = 1357] = 66.72, *p* < .001). The 'unstable' group stood out by significantly higher rates of experiencing both emotional abuse *F* (4, 1338) = 19.31 *p* < .001 and emotional neglect *F* (4, 1337) = 49.99 *p* < .001. In this group, the highest proportion of youths also described having less money than other families (13.6 %). The group with the highest proportion describing having more money than other families was the 'detached and fearless'; 31.8 %; *χ*2 [8, *N* = 1332] = 56.23, *p* < .001. In the 'avoidant' group, there was the highest proportion of parents not living together (22.3 %). The 'unstable' group had the lowest proportion of parents not living together 18.1 %; *χ*2 [4, *N* = 1352] = 27.51, *p* = < .001. In the 'unstable' group, there was the highest proportion who had been offered alcohol at T1 (22.6 %), while the 'social and content' group had the lowest proportion who had been offered alcohol, 3.8 %; *χ*2 [8, *N* = 1363] = 59.48, *p* < .001. At T2, the unstable group (19.4 %), now along with the 'sociable thrill-seekers' (19.3 %), still had the highest proportion being offered alcohol. Those least likely to be offered alcohol by their parents were still the 'social and content' individuals, 7.1 %; *χ*2 [4, *N* = 1187] = 26.79, *p* < .001. In the 'sociable thrill-seekers' group (71.6 %), there was the highest proportion of at-risk alcohol use at T3, while those who were 'avoidant' had the lowest proportion of at-risk alcohol use 33.7 %; *χ*2 [8, *N* = 774] = 49.02, *p* < .001. In the 'sociable thrill-seekers' group (28.4 %), there was also the highest proportion of indications of alcohol dependence at T3, while those who were 'avoidant' had the lowest proportion of indications of alcohol dependence 13.6 %; *χ*2 [4, *N* = 775] = 62.87, *p* < .001.

Supplementary table 2.
